# Supplementary material for: Potential Molecular Mechanism of Upregulated Aryl Hydrocarbon Receptor Nuclear Translocator 2 in Nasopharyngeal Carcinoma
Source: Hindawi journal article supplement (doi:10.1155/2022/9137282), 2022-09-27
Supplement: f1 [file 9137282.f1.pdf]

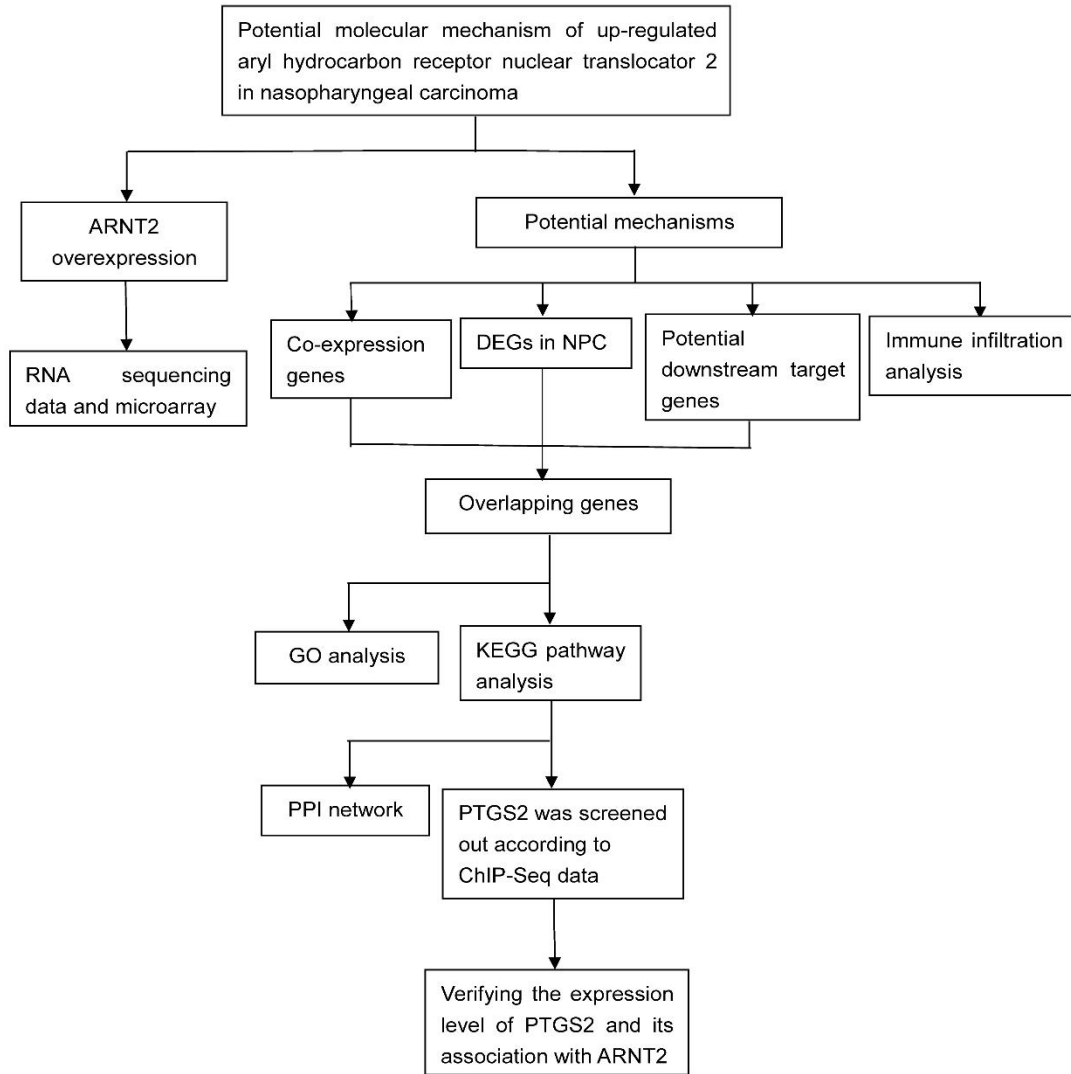

Supplementary Figure 1: Flow chart of the study design.

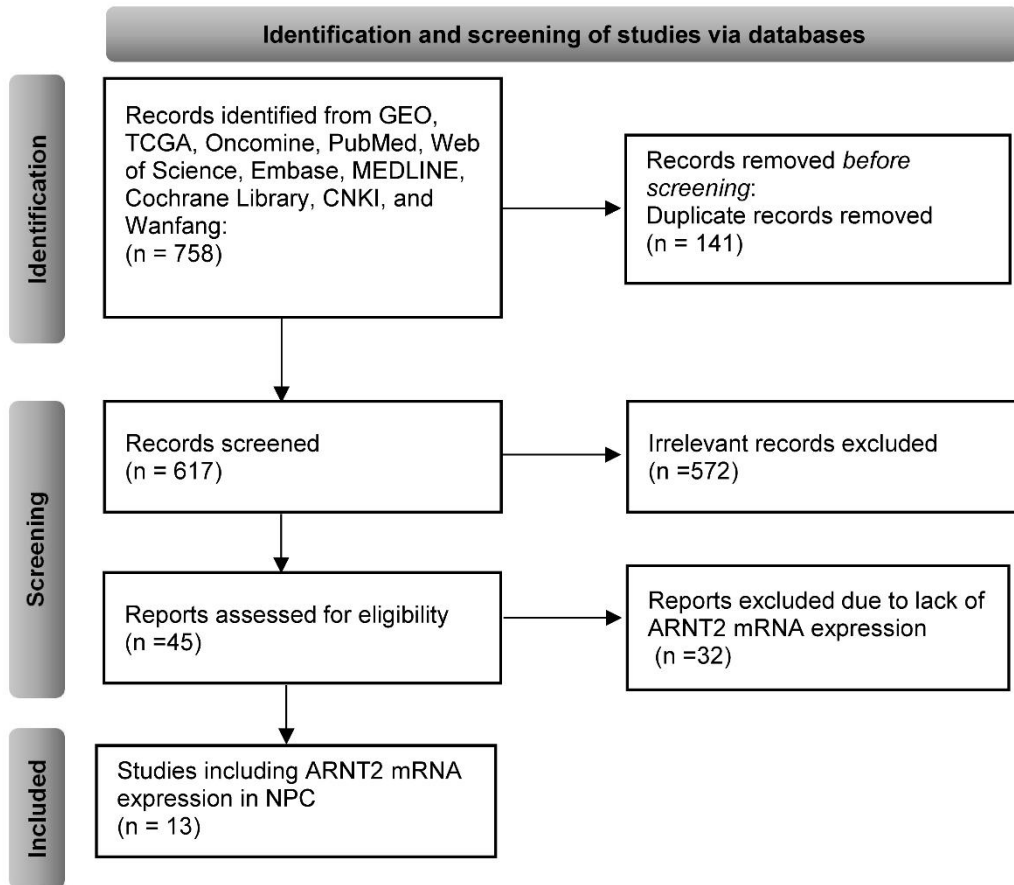

Supplementary Figure 2: Inclusion and exclusion of datasets.

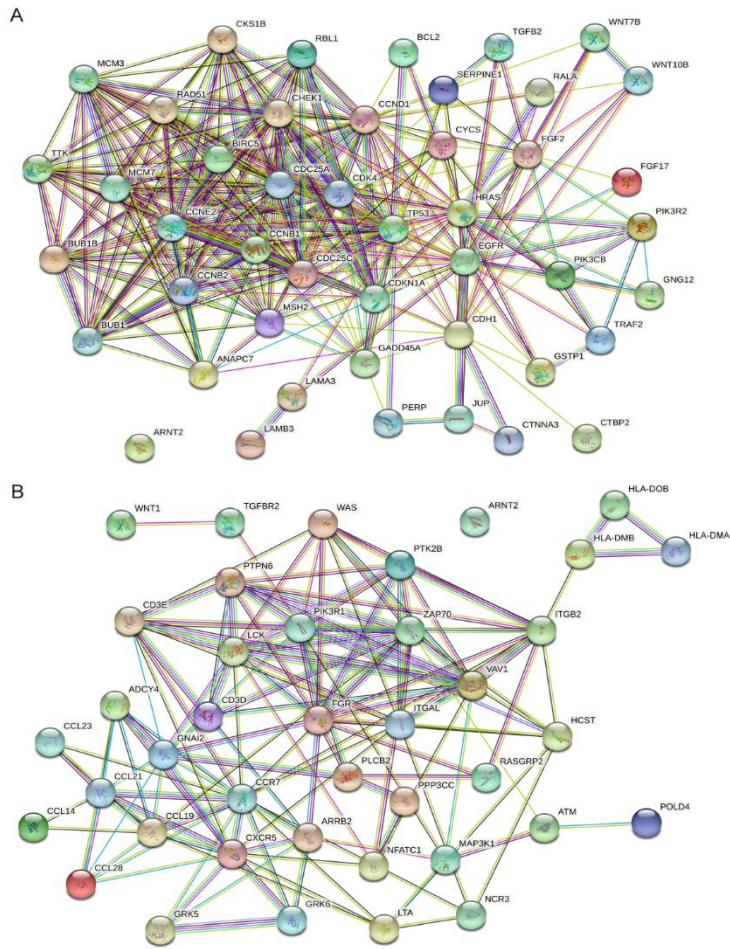

Supplementary Figure 3: PPI network of ARNT2-related target genes in NPC. (A) PPI network based on the genes of the first three KEGG pathways of intersection of up-regulated DEGs, ARNT2 positively correlated CEGs and target genes. (B) PPI network based on the genes of the first three KEGG pathways of intersection of down-regulated DEGs, ARNT2 negatively correlated CEGs and target genes.
